# Supplementary material for: Durvalumab ± Tremelimumab + Platinum-Etoposide in Extensive-Stage Small Cell Lung Cancer (CASPIAN): Outcomes by PD-L1 Expression and Tissue Tumor Mutational Burden
Source: PubMed Central journal article supplement — Clin Cancer Res. 2023 Oct 6;30(4):824–35. doi: 10.1158/1078-0432.CCR-23-1689 (PMC10870117; doi:10.1158/1078-0432.ccr-23-1689), 2023-10-06
Supplement: ccr-23-1689_supplementary_figure_s2_suppfs2.pdf [file ccr-23-1689_supplementary_figure_s2_suppfs2.pdf]

**Supplementary Figure S2.** Kaplan-Meier analysis of OS in the ITT population and the PD-L1 BEP. BEP, biomarker evaluable population; CI, confidence interval; D, durvalumab; EP, platinum-etoposide; CI, confidence interval; HR, hazard ratio, ITT, intention-to-treat; OS, overall survival; PD-L1, programmed cell death ligand-1; T, tremelimumab; TC, tumor cell.

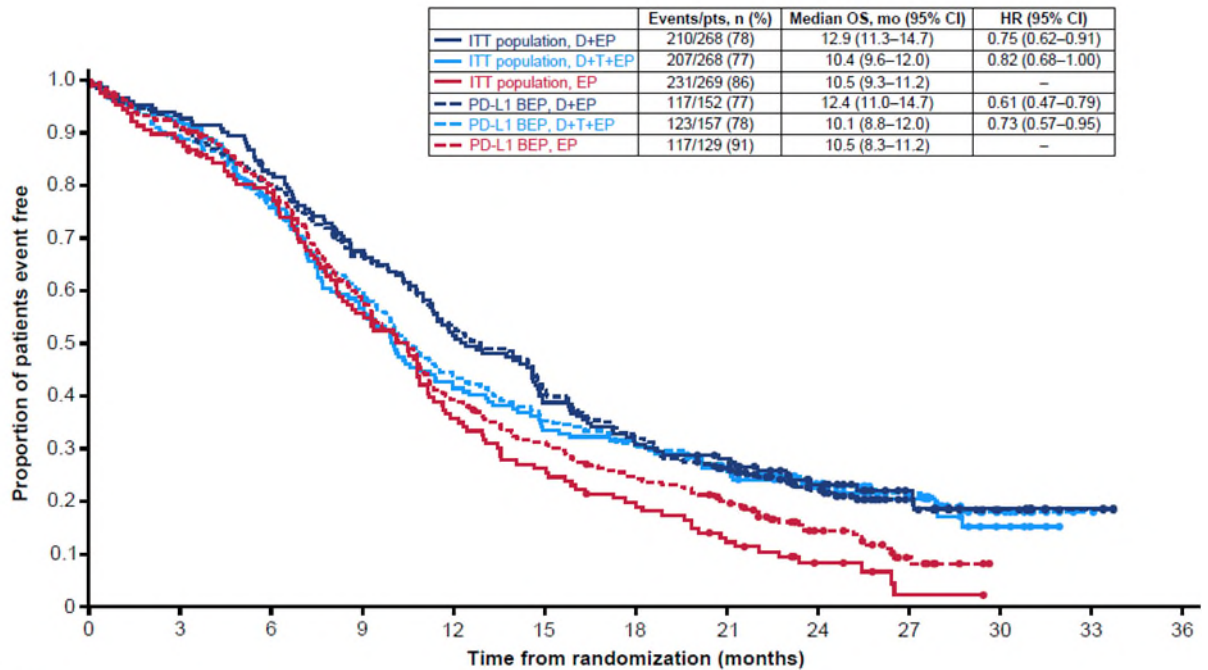

| Number of patients at risk | 0   | 3   | 6   | 9   | 12  | 15  | 18 | 21 | 24 | 27 | 30 | 33 | 36 |
|----------------------------|-----|-----|-----|-----|-----|-----|----|----|----|----|----|----|----|
| ITT population, D+EP       | 268 | 244 | 214 | 177 | 140 | 109 | 85 | 66 | 41 | 21 | 8  | 2  | 0  |
| ITT population, D+T+EP     | 268 | 238 | 200 | 156 | 114 | 92  | 80 | 67 | 47 | 30 | 11 | 1  | 0  |
| ITT population, EP         | 269 | 243 | 212 | 156 | 104 | 82  | 64 | 48 | 24 | 8  | 0  | 0  | 0  |
| PD-L1 BEP, D+EP            | 152 | 142 | 124 | 101 | 77  | 58  | 46 | 40 | 25 | 13 | 6  | 2  | 0  |
| PD-L1 BEP, D+T+EP          | 157 | 145 | 119 | 87  | 63  | 51  | 47 | 37 | 28 | 16 | 5  | 0  | 0  |
| PD-L1 BEP, EP              | 129 | 113 | 99  | 70  | 45  | 33  | 24 | 14 | 6  | 1  | 0  | 0  | 0  |
