# Supplementary material for: Durvalumab ± Tremelimumab + Platinum-Etoposide in Extensive-Stage Small Cell Lung Cancer (CASPIAN): Outcomes by PD-L1 Expression and Tissue Tumor Mutational Burden
Source: PubMed Central journal article supplement — Clin Cancer Res. 2023 Oct 6;30(4):824–35. doi: 10.1158/1078-0432.CCR-23-1689 (PMC10870117; doi:10.1158/1078-0432.ccr-23-1689), 2023-10-06

**Supplementary Figure S4.** Subgroup analysis of confirmed ORR by PD-L1 TC and IC expression for (A) durvalumab plus EP versus EP and (B) durvalumab plus tremelimumab plus EP versus EP. In each panel, the shaded band shows the confidence interval for the ITT population; circle sizes are proportional to the number of responses. Groups are not plotted when there are  $\leq 5$  responses across both arms. BEP, biomarker-evaluable population; CI, confidence interval; D, durvalumab; EP, platinum-etoposide; IC, immune cell; ITT, intention-to-treat; ORR, objective response rate; PD-L1, programmed cell death ligand-1; T, tremelimumab; TC, tumor cell.

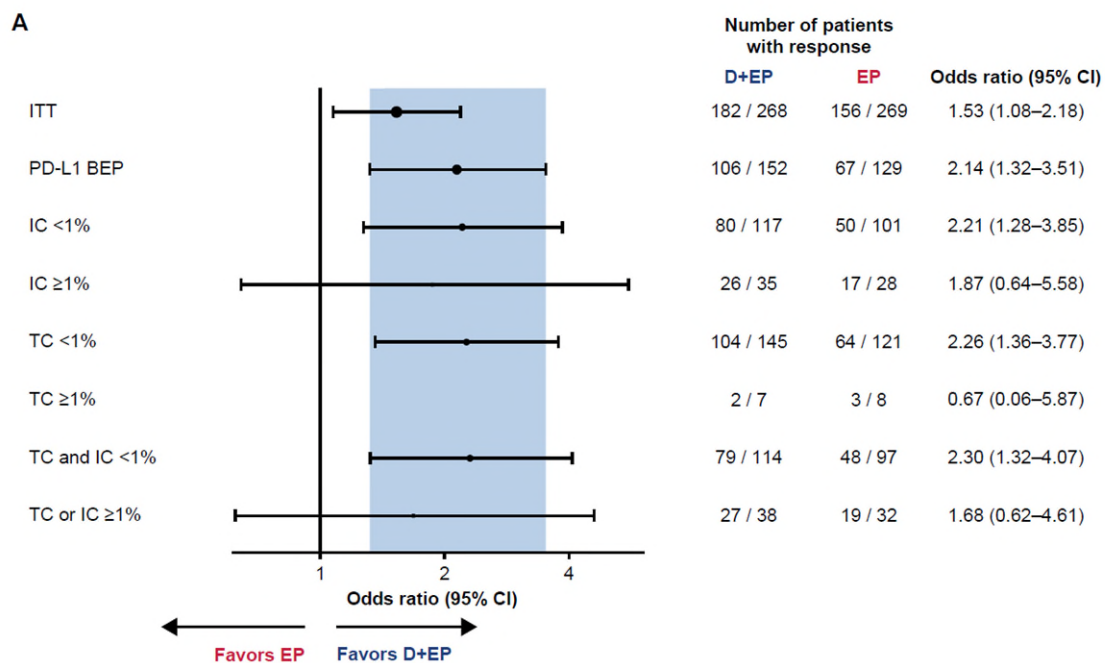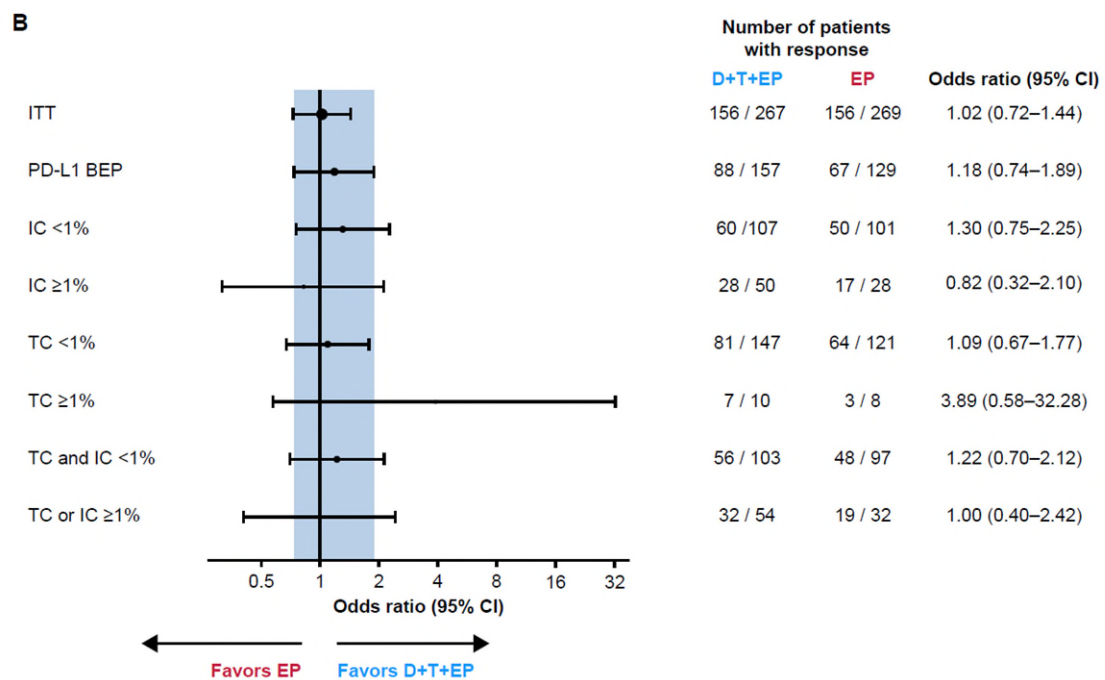

Supplement: ccr-23-1689_supplementary_figure_s4_suppfs4.pdf [file ccr-23-1689_supplementary_figure_s4_suppfs4.pdf]
