# Supplementary material for: Durvalumab ± Tremelimumab + Platinum-Etoposide in Extensive-Stage Small Cell Lung Cancer (CASPIAN): Outcomes by PD-L1 Expression and Tissue Tumor Mutational Burden
Source: PubMed Central journal article supplement — Clin Cancer Res. 2023 Oct 6;30(4):824–35. doi: 10.1158/1078-0432.CCR-23-1689 (PMC10870117; doi:10.1158/1078-0432.ccr-23-1689), 2023-10-06

**Supplementary Figure S5.** Kaplan-Meier analysis of OS in the ITT population and the tTMB BEP. BEP, biomarker-evaluable population; CI, confidence interval; D, durvalumab; EP, platinum-etoposide; HR, hazard ratio; ITT, intention-to-treat; OS, overall survival; T, tremelimumab; tTMB, tissue tumor mutational burden.

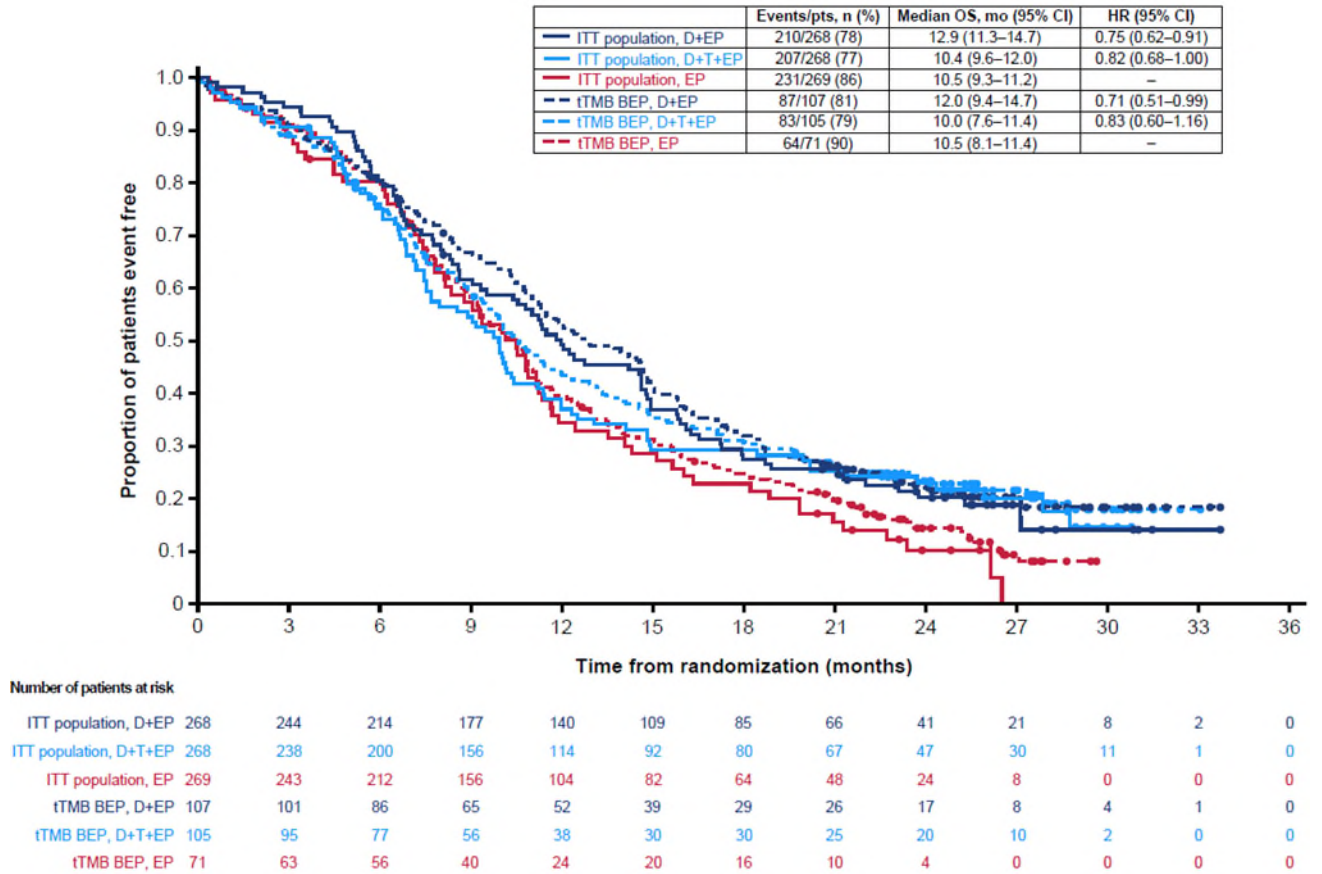

Supplement: ccr-23-1689_supplementary_figure_s5_suppfs5.pdf [file ccr-23-1689_supplementary_figure_s5_suppfs5.pdf]
