# Supplementary material for: Durvalumab ± Tremelimumab + Platinum-Etoposide in Extensive-Stage Small Cell Lung Cancer (CASPIAN): Outcomes by PD-L1 Expression and Tissue Tumor Mutational Burden
Source: PubMed Central journal article supplement — Clin Cancer Res. 2023 Oct 6;30(4):824–35. doi: 10.1158/1078-0432.CCR-23-1689 (PMC10870117; doi:10.1158/1078-0432.ccr-23-1689), 2023-10-06

**Supplementary Figure S8.** Prevalence of PD-L1 expression on TC and IC in the PD-L1 BEP. \*Includes patients whose tumors had <1% PD-L1 expression on TCs or ICs, but not absolute zero. BEP, biomarker evaluable population; IC, immune cell; PD-L1, programmed cell death ligand-1; TC, tumor cell.

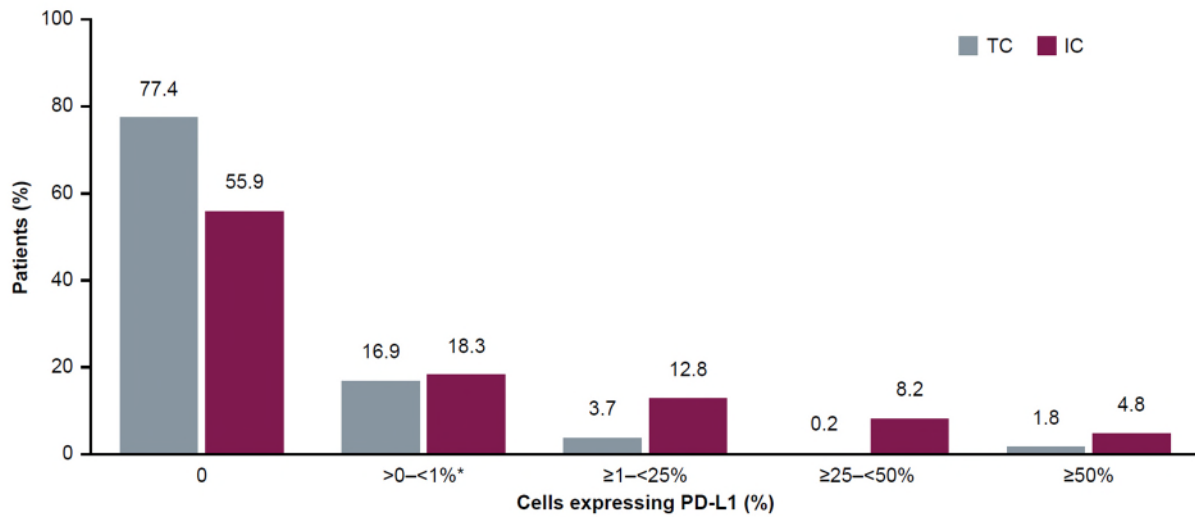

Supplement: ccr-23-1689_supplementary_figure_s8_suppfs8.pdf [file ccr-23-1689_supplementary_figure_s8_suppfs8.pdf]
