# Supplementary material for: Durvalumab ± Tremelimumab + Platinum-Etoposide in Extensive-Stage Small Cell Lung Cancer (CASPIAN): Outcomes by PD-L1 Expression and Tissue Tumor Mutational Burden
Source: PubMed Central journal article supplement — Clin Cancer Res. 2023 Oct 6;30(4):824–35. doi: 10.1158/1078-0432.CCR-23-1689 (PMC10870117; doi:10.1158/1078-0432.ccr-23-1689), 2023-10-06
Supplement: ccr-23-1689_supplementary_figure_s10_suppfs10.pdf [file ccr-23-1689_supplementary_figure_s10_suppfs10.pdf]

**Supplementary Figure S10.** Kaplan-Meier analysis of OS for (A) the tTMB <10 mut/Mb subgroup and (B) the tTMB ≥10 mut/Mb subgroup. CI, confidence interval; D, durvalumab; EP, platinum-etoposide; HR, hazard ratio; OS, overall survival; T, tremelimumab; tTMB, tissue tumor mutational burden.

**A**

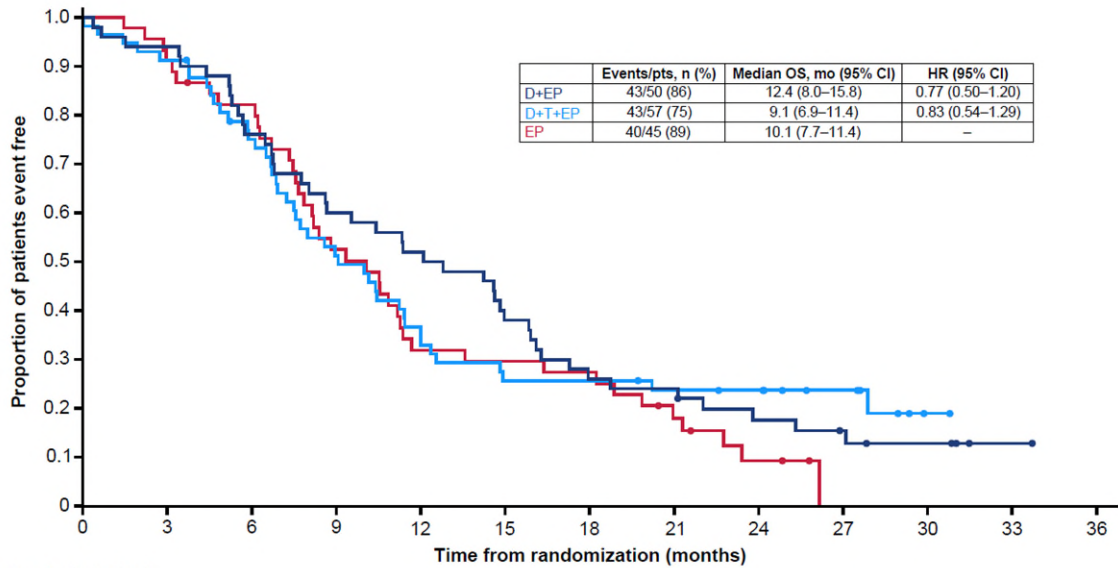

Number of patients at risk

|        |    |    |    |    |    |    |    |    |    |   |   |   |   |
|--------|----|----|----|----|----|----|----|----|----|---|---|---|---|
| D+EP   | 50 | 47 | 38 | 30 | 26 | 19 | 13 | 12 | 8  | 6 | 4 | 1 | 0 |
| D+T+EP | 57 | 52 | 41 | 28 | 18 | 14 | 14 | 12 | 11 | 7 | 1 | 0 | 0 |
| EP     | 45 | 41 | 36 | 23 | 14 | 13 | 12 | 7  | 3  | 0 | 0 | 0 | 0 |

**B**

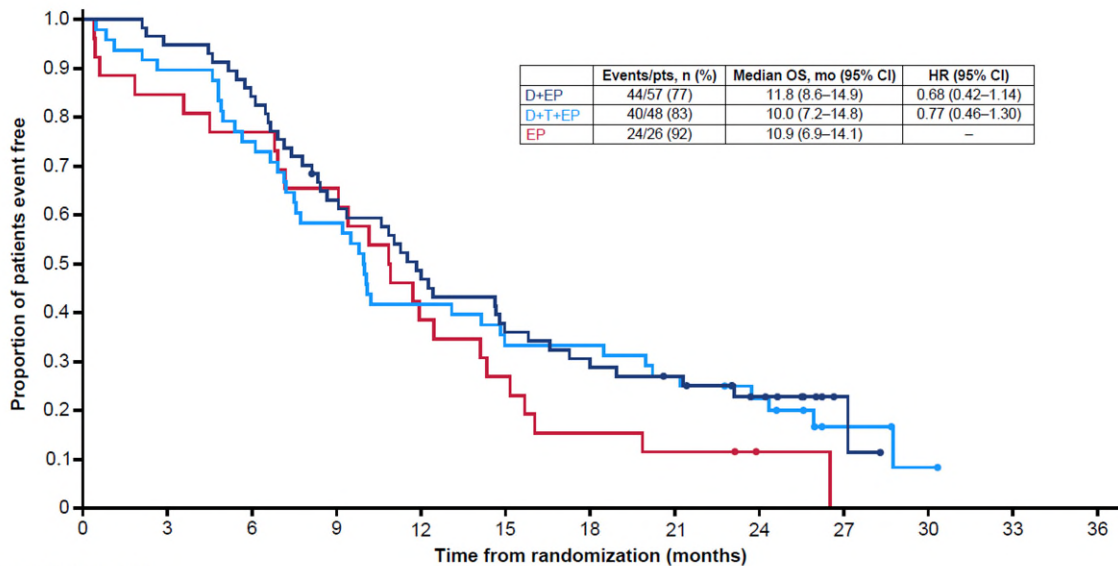

Number of patients at risk

|        |    |    |    |    |    |    |    |    |   |   |   |   |   |
|--------|----|----|----|----|----|----|----|----|---|---|---|---|---|
| D+EP   | 57 | 54 | 48 | 35 | 26 | 20 | 16 | 14 | 9 | 2 | 0 | 0 | 0 |
| D+T+EP | 48 | 43 | 36 | 28 | 20 | 16 | 16 | 13 | 9 | 3 | 1 | 0 | 0 |
| EP     | 26 | 22 | 20 | 17 | 10 | 7  | 4  | 3  | 1 | 0 | 0 | 0 | 0 |
