# Supplementary material for: Durvalumab ± Tremelimumab + Platinum-Etoposide in Extensive-Stage Small Cell Lung Cancer (CASPIAN): Outcomes by PD-L1 Expression and Tissue Tumor Mutational Burden
Source: PubMed Central journal article supplement — Clin Cancer Res. 2023 Oct 6;30(4):824–35. doi: 10.1158/1078-0432.CCR-23-1689 (PMC10870117; doi:10.1158/1078-0432.ccr-23-1689), 2023-10-06

**Supplementary Figure S11.** Relationship between PD-L1 expression and tTMB score. (A) Box plots showing the distribution of tTMB score in patients by PD-L1 subgroup; (B) Venn diagram showing overlap between the tTMB  $\geq 10$  mut/Mb and PD-L1 TC or IC  $\geq 1\%$  subgroups. Percentages are calculated from the PD-L1 and tTMB BEP, i.e., patients who had both a PD-L1 and a tTMB result ( $n=275$ ); samples from 171 patients had tTMB  $\geq 10$  mut/Mb and/or PD-L1 TC or IC  $\geq 1\%$ , while samples from 104 patients (37.8%) had both tTMB  $< 10$  mut/Mb and PD-L1 TC and IC  $< 1\%$ . BEP, biomarker evaluable population; IC, immune cell; mut/Mb, mutation per megabase; PD-L1, programmed cell death ligand-1; TC, tumor cell; TMB, tumor mutational burden.

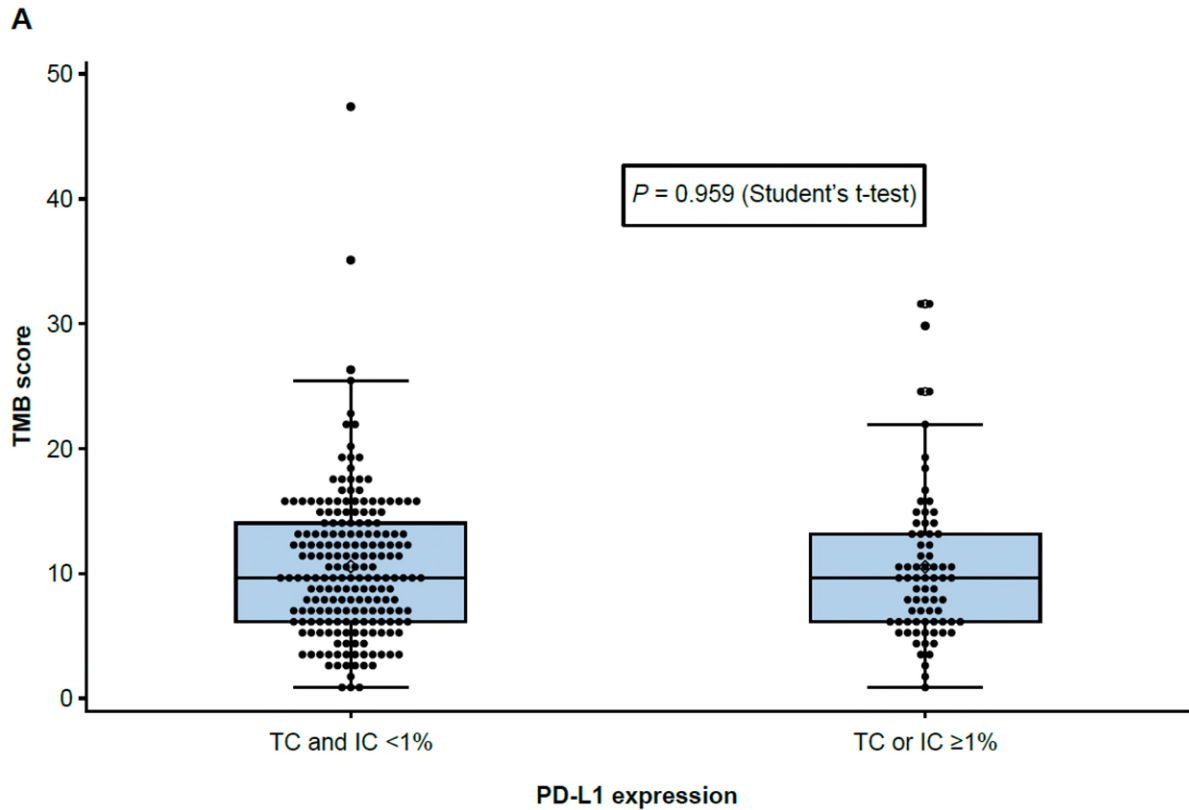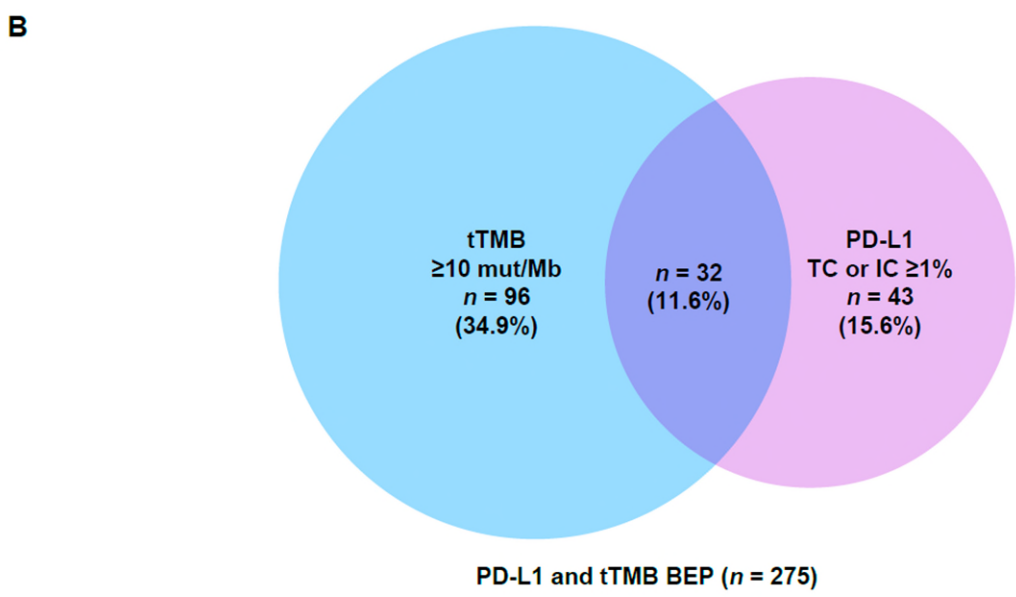

Supplement: ccr-23-1689_supplementary_figure_s11_suppfs11.pdf [file ccr-23-1689_supplementary_figure_s11_suppfs11.pdf]
