# Supplementary material for: Durvalumab ± Tremelimumab + Platinum-Etoposide in Extensive-Stage Small Cell Lung Cancer (CASPIAN): Outcomes by PD-L1 Expression and Tissue Tumor Mutational Burden
Source: PubMed Central journal article supplement — Clin Cancer Res. 2023 Oct 6;30(4):824–35. doi: 10.1158/1078-0432.CCR-23-1689 (PMC10870117; doi:10.1158/1078-0432.ccr-23-1689), 2023-10-06
Supplement: ccr-23-1689_supplementary_table_s4_suppts4.pdf [file ccr-23-1689_supplementary_table_s4_suppts4.pdf]

**Supplementary Table S4.** Treatment exposure by PD-L1 subgroup (PD-L1 safety population)

|                                                         | Durvalumab + EP<br>(n = 152) |                  | Durvalumab + tremelimumab + EP<br>(n = 157) |                  | EP<br>(n = 127) |                 |
|---------------------------------------------------------|------------------------------|------------------|---------------------------------------------|------------------|-----------------|-----------------|
|                                                         | TC and IC <1%                | TC or IC ≥1%     | TC and IC <1%                               | TC or IC ≥1%     | TC and IC <1%   | TC or IC ≥1%    |
| <b>Immunotherapy</b>                                    | <b>(n = 114)</b>             | <b>(n = 38)</b>  | <b>(n = 103)</b>                            | <b>(n = 54)</b>  | <b>(n = 95)</b> | <b>(n = 32)</b> |
| Median number of durvalumab doses (range)               | 7 (1–37)                     | 9 (1–33)         | 6 (1–32)                                    | 7 (1–31)         | -               | -               |
| Median total duration of durvalumab (range), weeks      | 26.7 (0.3–136.9)             | 34.3 (2.7–131.0) | 22.3 (2.0–124.9)                            | 28.2 (0.1–125.9) | -               | -               |
| Median number of tremelimumab doses (range)             | -                            | -                | 5 (1–5)                                     | 5 (1–6)          | -               | -               |
| Patients receiving 5 tremelimumab doses, n (%)          | -                            | -                | 63 (61.2)                                   | 41 (75.9)        | -               | -               |
| Median total duration of tremelimumab (range), weeks    | -                            | -                | 20.1 (2.0–30.9)                             | 20.0 (0.1–27.3)  | -               | -               |
| <b>Chemotherapy</b>                                     | <b>(n = 114)</b>             | <b>(n = 38)</b>  | <b>(n = 103)</b>                            | <b>(n = 53*)</b> | <b>(n = 95)</b> | <b>(n = 32)</b> |
| Patients treated with platinum, n (%) <sup>†</sup>      |                              |                  |                                             |                  |                 |                 |
| Carboplatin                                             | 92 (80.7)                    | 31 (81.6)        | 81 (78.6)                                   | 42 (79.2)        | 78 (82.1)       | 27 (84.4)       |
| Cisplatin                                               | 25 (21.9)                    | 9 (23.7)         | 25 (24.3)                                   | 11 (20.8)        | 23 (24.2)       | 6 (18.8)        |
| Median number of cycles of EP (range) <sup>‡</sup>      | 4 (1–5)                      | 4 (1–5)          | 4 (1–4)                                     | 4 (1–4)          | 6 (1–6)         | 6 (1–6)         |
| Patients receiving ≥4 cycles of EP, n (%) <sup>‡</sup>  | 102 (89.5)                   | 34 (89.5)        | 86 (83.5)                                   | 45 (84.9)        | 78 (82.1)       | 29 (90.6)       |
| Patients receiving ≥5 cycles of EP, n (%) <sup>‡</sup>  | 1 (0.9)                      | 1 (2.6)          | 0                                           | 0                | 65 (68.4)       | 23 (71.9)       |
| Patients receiving 6 cycles of EP, n (%) <sup>‡</sup>   | 0                            | 0                | 0                                           | 0                | 61 (64.2)       | 22 (68.8)       |
| Median total duration of EP (range), weeks <sup>‡</sup> | 12.1 (0.3–18.0)              | 12.2 (2.7–18.4)  | 12.3 (2.0–19.0)                             | 12.0 (3.0–17.1)  | 19.0 (0.4–25.9) | 19.0 (1.7–24.1) |

\*One patient in the durvalumab plus tremelimumab plus EP arm discontinued due to adverse events during the immunotherapy infusions before receiving any EP. <sup>†</sup>Patients were allowed to switch between carboplatin and cisplatin at the investigator's discretion. <sup>‡</sup>Based on etoposide exposure

EP, platinum-etoposide; IC, immune cell; PD-L1, programmed cell death ligand-1; TC, tumor cell.
